# Supplementary material
Source: PubMed Central journal article supplement (PMC4774543)
Supplement: NIHMS762419-supplement-1.pdf [file NIHMS762419-supplement-1.pdf]

**Supplementary Table 1: Repeated measures analysis, linear mixed effect model of variables associated with cholesterol changes over 2 year follow-up in the TEAR trial (DAS28 model)**

|                                               | TC     |         | HDL-C  |         | LDL-C  |         | TC/HDL-C |         |
|-----------------------------------------------|--------|---------|--------|---------|--------|---------|----------|---------|
|                                               | Effect | p-value | Effect | p-value | Effect | p-value | Effect   | p-value |
| DAS28 -per unit decrease                      | 2.68   | 0.011   | 1.27   | <0.001  | 1.67   | 0.035   | 0.03     | 0.045   |
| Age -per year increase                        | 1.05   | <0.001  | 0.25   | <0.001  | 0.66   | <0.001  | 0.00     | 0.371   |
| BMI- per unit increase                        | 1.03   | <0.001  | -0.32  | 0.001   | 0.85   | <0.001  | 0.03     | <0.001  |
| Treatment (Overall)                           |        | 0.355   |        | 0.001   |        | 0.071   |          | <0.001  |
| MTX + ETA vs TT                               | 5.98   | 0.174   | -4.42  | 0.002   | 7.87   | 0.023   | 0.24     | <0.001  |
| MTX vs TT                                     | 2.12   | 0.665   | -5.25  | 0.001   | 6.33   | 0.092   | 0.29     | <0.001  |
| MTX + ETA vs MTX                              | 3.86   | 0.359   | 0.83   | 0.542   | 1.54   | 0.630   | -0.05    | 0.428   |
| Female vs Male                                | 15.61  | 0.001   | 12.60  | <0.001  | 5.64   | 0.140   | -0.43    | <0.001  |
| Race (overall)                                |        | 0.006   |        | 0.013   |        | 0.314   |          | 0.075   |
| AA vs Caucasian                               | -16.71 | 0.018   | -0.16  | 0.943   | -6.16  | 0.284   | -0.24    | 0.041   |
| Others vs Caucasian                           | -17.15 | 0.016   | -6.72  | 0.003   | -6.79  | 0.241   | 0.10     | 0.414   |
| AA vs Others                                  | 0.44   | 0.963   | 6.56   | 0.033   | 0.63   | 0.935   | -0.34    | 0.035   |
| Baseline Smoking Yes vs No                    | 8.53   | 0.055   | -3.39  | 0.017   | 11.36  | 0.002   | 0.28     | <0.001  |
| Baseline Predisone Use Yes vs No              | 9.90   | 0.016   | 5.51   | <0.001  | 4.03   | 0.231   | -0.13    | 0.062   |
| Baseline Statin User: CVD vs no CVD           | -36.12 | 0.019   | -5.06  | 0.305   | -32.52 | 0.011   | -0.43    | 0.091   |
| Baseline No Statin: CVD vs no CVD             | -15.06 | 0.263   | -5.42  | 0.209   | -10.97 | 0.318   | 0.07     | 0.763   |
| Baseline CVD : stain vs no statin             | -52.20 | 0.007   | -4.40  | 0.478   | -52.02 | 0.001   | -0.67    | 0.037   |
| Baseline No CVD : stain vs no statin          | -31.14 | <0.001  | -4.76  | 0.076   | -30.46 | <0.001  | -0.17    | 0.214   |
| Baseline Statin User: diabetes vs no diabetes | -11.05 | 0.383   | 0.41   | 0.919   | -8.32  | 0.426   | -0.19    | 0.373   |
| Baseline No Statin: diabetes vs no diabetes   | -12.52 | 0.145   | -2.76  | 0.316   | -14.92 | 0.034   | 0.09     | 0.522   |
| Baseline diabetes : statin vs no statin       | -29.67 | 0.029   | -1.59  | 0.714   | -23.87 | 0.032   | -0.45    | 0.046   |
| Baseline No diabetes : statin vs no statin    | -31.14 | <0.001  | -4.76  | 0.076   | -30.46 | <0.001  | -0.17    | 0.214   |

Change in TC, HDL-C, LDL-C, and TC/HDL-C are shown per categorical variable or per unit change in continuous variables as specified. Only significant associations besides time are shown in the table. DAS28 = disease activity score using a 28 joint count, BMI= body mass index, MTX = methotrexate, ETA= etanercept, TT= triple therapy, AA= African American, CVD = cardiovascular disease.
