# Supplementary material
Source: PubMed Central journal article supplement (PMC4774543)
Supplement: NIHMS762419-supplement-2.pdf [file NIHMS762419-supplement-2.pdf]

**Supplementary Table 2: Repeated measures analysis, linear mixed effect model of variables associated with cholesterol changes over 2 year follow-up in the TEAR trial (ESR model)**

|                                               | TC     |         | HDL-C  |         | LDL-C  |         | TC/HDL-C |         |
|-----------------------------------------------|--------|---------|--------|---------|--------|---------|----------|---------|
|                                               | Effect | p-value | Effect | p-value | Effect | p-value | Effect   | p-value |
| ESR- per unit decrease                        | 0.37   | <0.001  | 0.14   | <0.001  | 0.21   | <0.001  | 0.00     | 0.220   |
| Age- per year increase                        | 1.10   | <0.001  | 0.27   | <0.001  | 0.69   | <0.001  | 0.00     | 0.373   |
| BMI- per unit increase                        | 1.05   | <0.001  | -0.32  | 0.001   | 0.86   | <0.001  | 0.03     | <0.001  |
| Treatment (overall)                           |        | 0.343   |        | 0.002   |        | 0.068   |          | <0.001  |
| MTX + ETA vs TT                               | 6.10   | 0.162   | -4.39  | 0.002   | 7.89   | 0.023   | 0.24     | <0.001  |
| MTX vs TT                                     | 2.37   | 0.623   | -4.95  | 0.002   | 6.48   | 0.082   | 0.27     | <0.001  |
| MTX + ETA vs MTX                              | 3.73   | 0.367   | 0.56   | 0.673   | 1.41   | 0.654   | -0.03    | 0.609   |
| Female vs Male                                | 16.64  | <0.001  | 12.90  | <0.001  | 6.09   | 0.110   | -0.43    | <0.001  |
| Race (overall)                                |        | 0.041   |        | 0.030   |        | 0.566   |          | 0.069   |
| AA vs Caucasian                               | -12.26 | 0.084   | 1.38   | 0.544   | -3.75  | 0.517   | -0.25    | 0.036   |
| Others vs Caucasian                           | -14.31 | 0.044   | -5.75  | 0.012   | -5.26  | 0.364   | 0.09     | 0.438   |
| AA vs Others                                  | 2.06   | 0.829   | 7.13   | 0.020   | 1.51   | 0.846   | -0.34    | 0.033   |
| Baseline Smoking Yes vs No                    | 8.71   | 0.049   | -3.32  | 0.020   | 11.40  | 0.002   | 0.28     | <0.001  |
| Baseline Predisone Use Yes vs No              | 10.27  | 0.012   | 5.68   | <0.001  | 4.24   | 0.206   | -0.13    | 0.055   |
| Baseline Statin User: CVD vs no CVD           | -37.57 | 0.014   | -5.42  | 0.271   | -33.55 | 0.009   | -0.44    | 0.087   |
| Baseline No Statin: CVD vs no CVD             | -16.35 | 0.222   | -5.82  | 0.177   | -11.75 | 0.284   | 0.07     | 0.766   |
| Baseline CVD : stain vs no statin             | -51.29 | 0.008   | -3.96  | 0.523   | -51.45 | 0.001   | -0.68    | 0.035   |
| Baseline No CVD : stain vs no statin          | -30.07 | <0.001  | -4.35  | 0.104   | -29.65 | <0.001  | -0.18    | 0.204   |
| Baseline Statin User: diabetes vs no diabetes | -10.48 | 0.405   | 0.59   | 0.884   | -8.34  | 0.424   | -0.19    | 0.376   |
| Baseline No Statin: diabetes vs no diabetes   | -13.26 | 0.121   | -3.04  | 0.269   | -15.34 | 0.029   | 0.09     | 0.507   |
| Baseline diabetes : stain vs no statin        | -27.29 | 0.044   | -0.73  | 0.867   | -22.65 | 0.041   | -0.46    | 0.043   |
| Baseline No diabetes : stain vs no statin     | -30.07 | <0.001  | -4.35  | 0.104   | -29.65 | <0.001  | -0.18    | 0.204   |

Change in TC, HDL-C, LDL-C, and TC/HDL-C are shown per categorical variable or per unit change in continuous variables as specified. Only significant associations besides time are shown in the table ESR= erythrocyte sedimentation rate, BMI= body mass index, MTX = methotrexate, ETA= etanercept, TT= triple therapy, AA= African American, CVD = cardiovascular disease.
